# Supplementary material for: Health Risks and Public Safety Concerns of Illicit Alcohol in Uganda: Alcohol Content, Hygiene &amp; Sanitation in Production and Retail
Source: Research Square preprint supplement (doi:10.21203/rs.3.rs-8041331/v1), 2025-12-17
Supplement: Supplementary file 1 [file 756981193996fea6c9ff65c5.docx]

**Consumption of Illicit Alcohol in Uganda Study**

**RETAILERS QUESTIONAIRE**

**Introductions:** Thank you for meeting with me today. I’m from Makerere University. We would like to get your views regarding alcohol consumption in Uganda. Before we begin the interview, let me read a consent form that explains the purpose, objectives, benefits, and risks of participating in this study. I will then allow you to ask questions or seek clarification regarding the study. After that, I will then ask whether you agree to participate in the interview or not.

**Practice Descriptive Information: *Please read verbatim*** *“*Globally, illicit alcohol poses a significant public health and economic threat due to the associated factors. Illicit alcohol refers to alcoholic beverages, whether fermented or distilled, that exist outside the legal regulatory framework of a given country. These drinks include Crude waragi, kwetee, muramba, Magwa etc. These beverages are produced, distributed, or sold without adhering to the established laws and regulations governing alcohol production, distribution, and sale. Illicit alcohol can encompass various forms, including counterfeit and illicit brands, smuggled alcohol, illicit homebrew, surrogate alcohol, and cases where proper taxation procedures have not been followed*”*

*READ CONSENT FORM and obtain consent from the respondent before you commence with the interview.*

| **S/N** | **Question** | **Response** |
| --- | --- | --- |
| 1.1 | Are you **involved** in the retail or distribution of any alcohol? | 1. Yes (Proceed to 1.2) 2. No (Terminate the interview) |
| 1.2 | What type of alcohol do you sell? | 1. Illicit 2. Licit 3. Both illicit and licit |
| 1.3 | Interviewer ID |  |
| 1.4 | Start time/ Date |  |
| 1.5 | End time/ Date |  |

| **S/N** | **Location** | **Response** |
| --- | --- | --- |
| 2.1 | District | *1. Arua*  *2. Kampala* |
| 2.2 | Location of Bar | 1. *City* 2. *Peri-Urban* 3. *Urban* 4. *Rural* |
| 2.3 | Proximity of the bar to other places | 1. *On a busy high street* 2. *In a market* 3. *Near a school* 4. *Near Government offices* 5. *Industrial Area, Compound* 6. *Other (Specify)* |

**100: SECTION ONE**

| **Demographic Information for Responds** | | |
| --- | --- | --- |
| **S/N** | Question | Response |
| 101 | Gender | 1. *Male* 2. *Female* |
| 102 | Age (Complete year) | ……… |
| 103 | In total, how many years have you spent at school and in full-time study (excluding pre-school)? | *…………* |
| 104 | Highest education level | 1. *No Education* 2. *Primary* 3. *Secondary* 4. *Tertiary* 5. *University* |
| 105 | Occupation | 1. *Unemployed* 2. *Self-employed* 3. *Formal employment* 4. *Informal employment* 5. *Others…(Specify)* |
| 106 | Marital status | 1. *Currently Married* 2. *Single* 3. *Divorced* 4. *Living together* 5. *Separated* 6. *Widow(er)* |
| 107 | How many members live in your household? | *… …* |
| 108 | How many children (below 18 years old) live in this household? | 1. *Males: _______* 2. *Females: _____* |
| 109 | How many adults (above 18 years old) live in this household? | 1. *Males: _______* 2. *Females: _____* |
| 110 | Average monthly income (Ugx) | 1. *Less than 500,000* 2. *500,000 - 1,000,000* 3. *1,000,001 - 2,000,000* 4. *2,000,001 - 3,000,000* 5. *3,000,001 - 5,000,000* 6. *5,000,001 - 7,500,000* 7. *7,500,001 - 10,000,000* 8. *More than 10,000,000* |

**200: SECTION TWO**

| **Characteristics of Retailers/ Distributors** | | |
| --- | --- | --- |
| **S/N** | **Question** | **Response** |
| 201 | How long have you been in the alcohol retail/ distribution business (in years)? | 1. *Less than one year* 2. *1-3* 3. *4-6* 4. *7-10*   *Above 10* |
| 202 | How many people do you employ/work for you? | 1. *1-4* 2. *5-10 people* 3. *11-29 people* 4. *Above 30 people* |
| 203 | What is the asset value of your business? | 1. *Less than Ugx 10,000,000* 2. *10,000,000 – 100,000,000* 3. *Above Ugx 100,000,000* |
| 204 | Have you registered/ acquired a license to operate? | 1. *Yes* 2. *No* 3. *Not Interested* |
| 205 | The type of retail/ distributor business | 1. *Local Bar (Kafunda)* 2. *Formal bar* 3. *Shebeen* 4. *Formal restaurant* 5. *Informal roadside restaurant* 6. *Bottle store* 7. *Supermarket* 8. *Beer kiosk* 9. *Other (please specify)* |

**300: SECTION THREE**

| **Background Information on Alcohol Being Sold** | | |
| --- | --- | --- |
| **S/N** | **QUESTIONS** | **Response** |
| 301 | Do you own any additional alcohol businesses? (specify # and type) | 1. *Yes* 2. *No (Skip to …)* |
| 302 | If yes, what type of retail? | 1. *Local Bar (Kafunda)* 2. *Formal bar* 3. *Shebeen* 4. *Formal restaurant* 5. *Informal roadside restaurant* 6. *Bottle store* 7. *Supermarket* 8. *Beer kiosk* 9. *Other (please specify)* |
| 303 | What is the most **commonly** sold type of alcohol? (Including beer, spirits, wines) | 1. *Opaque Beer* 2. *Clear Beer* 3. *Spirits* 4. *Wines* |
| 304 | Apart from the most commonly sold type of alcohol, what other types of alcohol do you sell? (Including beer, spirits, wines) (Multiple) | 1. *Opaque Beer* 2. *Clear Beer* 3. *Spirits* 4. *Wines* |
| 305 | What is the age group of clients who buy most alcohol from you? | 1. *Minors (< 18 years)* 2. *Youth (18-29 years)* 3. *Middle-aged Adults (30 – 45 years)* 4. *Older (above 45 years)* |
| 306 | How often do you stock…? | 1. *Daily* 2. *Weekly* 3. *Bi-weekly* 4. *Monthly* 5. *Others (Specify)* |
| 307 | Who are your suppliers/ distributors? | 1. *Formal distributor* 2. *Wholesaler* 3. *Supermarket* 4. *Another Liquor Store* 5. *A distiller/brewer within the community.* 6. *A distiller/brewer outside the community* |
| 308 | On average, how many liters (L) of alcohol do you sell **per day**? | 1. *Less than 20L* 2. *20L to 40L* 3. *41L to 100L* 4. *More than 100L* |
| 309 | What type of containers do you use to sell alcohol to your consumers for consumption? | 1. *Plastic Cup* 2. *Sachets* 3. *Plastic Bottle* 4. *Glass* 5. *Clay Pots* 6. *Wooden* 7. *Metallic* 8. *Calabash* 9. *Stainless Steel* 10. *Others (Specify* |
| 310 | What time of the year do you have peak sales? (Write the month) | ………………………… |
| 310b | What could be the reason? | ………………………… |
| 311 | What is the peak selling time of the day? | 1. *Early Morning (07:00 a.m.–10:00 a.m.)* 2. *Mid-morning (10:00 a.m. – 12:00 p.m.)* 3. *Afternoon (12:00 p.m. – 40:00 p.m.)* 4. *Evening (04:00 p.m. – 07:00 p.m.)* 5. *Night time (07:00 p.m. – until late)* |
| 312 | What could be the reason? | ………………………… |
| 313 | Have you received any complaints from consumers about the nature of alcohol sold? | 1. *Yes* 2. *No* |
| 314 | If yes, describe the nature of the complaint |  |
| 315 | What steps have you taken to address some of the harms/issues posed by your customers of that type of alcohol? |  |

**Biochemical Lab Analysis Tool**

| **S/N** | **Place** | **Name of Brand** | **Label** | **ABV% Content Analysis** | **Analysis of Contaminants and Impurities (Plastics, metals and others)** |
| --- | --- | --- | --- | --- | --- |
| 1 |  |  |  |  |  |
| 2 |  |  |  |  |  |
| 3 |  |  |  |  |  |
| 4 |  |  |  |  |  |
| 5 |  |  |  |  |  |
| 6 |  |  |  |  |  |
| 7 |  |  |  |  |  |
| 8 |  |  |  |  |  |
| 10 |  |  |  |  |  |
| 11 |  |  |  |  |  |
| 12 |  |  |  |  |  |
| 13 |  |  |  |  |  |
| 14 |  |  |  |  |  |
| 15 |  |  |  |  |  |
| 16 |  |  |  |  |  |
| 17 |  |  |  |  |  |
| 18 |  |  |  |  |  |
| 19 |  |  |  |  |  |
| 20 |  |  |  |  |  |

**Observation Checklist - Sanitation and Hygiene**

| **Observation Area** | **Checklist Item** | **Yes** | **No** | **Comments** |
| --- | --- | --- | --- | --- |
| **1. Retail Environment and Handling** | | | | |
| **Retail Area Hygiene** | | | | |
| a | Is the retail area where illicit spirits are sold visibly clean and free from potential contaminants? |  |  |  |
| b | Are the products displayed in a manner that minimizes exposure to unsanitary conditions (e.g., dust, pests)? |  |  |  |
| **Handling of Products** | | | | |
| a | Are retail workers handling products with clean hands and using sanitary practices? |  |  |  |
| b | Are there unsanitary practices observed during the handling or transfer of illicit spirits (e.g., unclean surfaces, improper packaging)? |  |  |  |
| **Storage and Display Conditions** | | | | |
| a | Are illicit spirits stored and displayed in conditions that prevent spoilage and contamination? |  |  |  |
| b | Is there evidence of exposure to elements that could compromise the safety of the products (e.g., sunlight, extreme temperatures)? |  |  |  |
| **2. Potential Health Impacts** | | | | |
| **Signs of Contamination** | | | | |
| a | Are there visible signs of contamination (e.g., discoloration, sediment) in the illicit spirits being produced or sold? |  |  |  |
| b | Have there been any reports or observations of health issues among consumers linked to the products from this production site? |  |  |  |
| **Consumer Safety** | | | | |
| a | Is there evidence that the production and retail practices could lead to health risks (e.g., gastrointestinal issues, poisoning) for consumers? |  |  |  |
| b | Are there any warnings or information provided to consumers about potential health risks associated with the illicit spirits? |  |  |  |

**Consumption of Illicit Alcohol in Uganda Study**

**BREWERS QUESTIONAIRE**

**Introductions:** Thank you for meeting with me today. I’m from Makerere University. We would like to get your views regarding alcohol consumption in Uganda. Before we begin the interview, let me read a consent form that explains the purpose, objectives, benefits, and risks of participating in this study. I will then allow you to ask questions or seek clarification regarding the study. After that, I will then ask whether you agree to participate in the interview or not.

**Practice Descriptive Information: *Please read verbatim*** *“*Globally, illicit alcohol poses a significant public health and economic threat due to the associated factors. Illicit alcohol refers to alcoholic beverages, whether fermented or distilled, that exist outside the legal regulatory framework of a given country. These drinks include Crude waragi, kwetee, muramba, Magwa etc. These beverages are produced, distributed, or sold without adhering to the established laws and regulations governing alcohol production, distribution, and sale. Illicit alcohol can encompass various forms, including counterfeit and illicit brands, smuggled alcohol, illicit homebrew, surrogate alcohol, and cases where proper taxation procedures have not been followed*”*

*READ CONSENT FORM and obtain consent from the respondent before you commence with the interview.*

| **S/N** | **Question** | **Response** |
| --- | --- | --- |
| 1.1 | Are you **involved** in the production or distribution/ retail of any alcohol? | 1. Yes (Proceed to 1.2) 2. No (Terminate the interview) |
| 1.2 | What type of alcohol do you produce? | 1. Illicit 2. Licit (Terminate the interview) |
| 1.3 | Interviewer ID |  |
| 1.4 | Start time/ Date |  |
| 1.5 | End time/ Date |  |

| **S/N** | **Location** | **Response** |
| --- | --- | --- |
| 2.1 | Location | *1. Arua*  *2. Kampala* |
| 2.2 | Place of Production | 1. *City* 2. *Peri-Urban* 3. *Urban* 4. *Rural* |
| 2.3 | Proximity of production site to other places | 1. On a busy high street 2. In a market 3. Near a school 4. Near Government offices 5. Industrial Area, Compound 6. Other (Specify) |

**100: SECTION ONE**

| **Demographic Information for Responds** | | |
| --- | --- | --- |
| **S/N** | Question | Response |
| 101 | Gender | 1. *Male* 2. *Female* |
| 102 | Age (in complete years) | ……… |
| 103 | In total, how many years have you spent at school and in full-time study (excluding pre-school)? | *…………* |
| 104 | Highest education level | 1. *No Education* 2. *Primary* 3. *Secondary* 4. *Tertiary* 5. *University* |
| 105 | Occupation | 1. *Unemployed* 2. *Self-employed* 3. *Formal employment* 4. *Informal employment* 5. *Others…(Specify)* |
| 106 | Marital status | 1. *Currently Married* 2. *Single* 3. *Divorced* 4. *Living together* 5. *Separated* 6. *Widow(er)* |
| 107 | How many members live in your household? | *… .…* |
| 108 | How many children (below 18 years old) live in this household? | 1. *Males: _______* 2. *Females: _____* |
| 109 | How many adults (above 18 years old) live in this household? | 1. *Males: _______* 2. *Females: _____* |
| 110 | Average monthly income (Ugx) | 1. *Less than 500,000* 2. *500,000 - 1,000,000* 3. *1,000,001 - 2,000,000* 4. *2,000,001 - 3,000,000* 5. *3,000,001 - 5,000,000* 6. *5,000,001 - 7,500,000* 7. *7,500,001 - 10,000,000* 8. *More than 10,000,000* |

**200: SECTION TWO**

| **Characteristics of Breweries** | | |
| --- | --- | --- |
| **S/N** | **Question** | **Response** |
| 201 | How long have you been in the alcohol brewing business (in years) | 1. *Less than one year* 2. *1-3* 3. *4-6* 4. *7-10*   *Above 10* |
| 202 | How many people do you employ/work for you? | 1. *1-4* 2. *5-10 people* 3. *11-29 people* 4. *Above 30 people* |
| 203 | What is the asset value of your business? | 1. *Less than Ugx 10,000,000* 2. *10,000,000 – 100,000,000* 3. *Above Ugx 100,000,000* |
| 204 | Have you registered/ acquired a license to operate? | 1. *Yes* 2. *No* 3. *Not Interested* |

**300: SECTION THREE**

| **Background Information on Alcohol Being Produced** | | |
| --- | --- | --- |
| **S/N** | **Question** | **Response** |
| 301 | What type of alcohol do you majorly produce? (Including beer, spirits, wines) | 1. *Opaque Beer* 2. *Clear Beer* 3. *Spirits* 4. *Wines* |
| 302 | Apart from the major alcohol that you produce, what other types of alcohol do you make? (Including beer, spirits, wines) | 1. *Opaque Beer* 2. *Clear Beer* 3. *Spirits* 4. *Wines* |
| 303 | What ingredients do you use in the production of alcohol? (*multiple choices)* | 1. *Molasses* 2. *Millet* 3. *Sorghum* 4. *Maize* 5. *Others (specify)……………...* |
| 304 | Do you maintain the **ratios** of the ingredients that you use in the production of alcohol? | 1. Yes 2. No 3. I don’t know |
| 305 | How **often** do you produce alcohol? | 1. *Daily* 2. *Weekly* 3. *Bi-weekly* 4. *Monthly* 5. *Others (Specify)* |
| 306 | On average, how many liters (L) of alcohol do you produce **per day**? | 1. *Less than 20L* 2. *20L to 40L* 3. *41L to 100L* 4. *More than 100L* |
| 307 | What type of containers do you use in the production of alcohol? (Multiple responses) | 1. *Plastic* 2. *Wooden* 3. *Metallic* 4. *Glass* 5. *Stainless Steel* 6. *Others (Specify)* |
| 308 | Whom are you producing for? | 1. *Consumers only (B2C)* 2. *Other businesses only (B2B)* 3. *Both consumers AND businesses* 4. *Home Consumption* |
| 309 | If B2C: What is the age group of clients who buy most alcohol from you? | 1. *Minors (< 18 years)* 2. *Youth (18-29 years)* 3. *Middle-aged Adults (30 – 45 years)* 4. *Older (above 45 years)* |
| 309a | Skip logic: If B2B: What businesses do you sell to? (can choose multiple) | 1. *Local Bar (Kafunda)* 2. *Formal bar* 3. *Liquor store/bottle store* 4. *Supermarket* 5. *Restaurant* 6. *Shebeen* 7. *Other (specify)* |
| 309b | How do you sell or package your alcohol for selling? (can choose multiple) | 1. *Plastic Cup* 2. *Sachets* 3. *Plastic Bottle* 4. *Glass* 5. *Clay Pots* 6. *Wooden* 7. *Metallic* 8. *Calabash* 9. *Stainless Steel* 10. *Others (Specify* |
| 310 | In what quantities do you sell or package your alcohol for selling? (Volume in Litres) | … … |
| 311 | What time of the year do you have peak sells? (Write the month) | ………………………… |
| 311a | What could be the reason? | ………………………… |
| 312 | What is the peak selling time of the day? | 1. *Early Morning (07:00 a.m. – 10:00 a.m.)* 2. *Mid-morning (10:00 a.m. – 12:00 p.m.)* 3. *Afternoon (12:00 p.m. – 40:00 p.m.)* 4. *Evening (04:00 p.m. – 07:00 p.m.)* 5. *Night time (07:00 p.m. – until late)* |
| 312a | What could be the reason? | ………………………… |
| 313 | Do you know the alcohol content (ABV) of the alcohol that you produce? | 1. *Yes* 2. *No* |
| 314 | If yes, what is the ABV of the alcohol you distill/brew? | 1. *3 – 5%* 2. *6 – 20%* 3. *21 – 50%* 4. *Above 50%* 5. *I don’t know* |
| 315 | Is the ABV of the alcohol you distill/brew the same in every batch? | 1. *Yes* 2. *No*   *I don’t know* |
| 316 | Have you ever had a situation in which the alcohol you brewed/ distilled made people sick? | 1. *Yes [specify situation/cause]* 2. *No* 3. *I don’t know* |
| 317 | If yes, what have you done to prevent a similar situation from reoccurring? | … … |

**Biochemical Lab Analysis Tool for illicit and Illicit Alcohol**

| **S/N** | **Name of Brand** | **Label** | **ABV% Content Analysis** | **Analysis of Contaminants and Impurities (Plastics, metals and others)** |
| --- | --- | --- | --- | --- |
| 1 |  |  |  |  |
| 2 |  |  |  |  |
| 3 |  |  |  |  |
| 4 |  |  |  |  |
| 5 |  |  |  |  |
| 6 |  |  |  |  |
| 7 |  |  |  |  |
| 8 |  |  |  |  |
| 10 |  |  |  |  |
| 11 |  |  |  |  |
| 12 |  |  |  |  |
| 13 |  |  |  |  |
| 14 |  |  |  |  |
| 15 |  |  |  |  |
| 16 |  |  |  |  |
| 17 |  |  |  |  |
| 18 |  |  |  |  |
| 19 |  |  |  |  |
| 20 |  |  |  |  |

**Sanitation and Hygiene Observation Checklist for Production of Illicit Alcohol**

| **Observation Area / Checklist Item** | | **Yes** | **No** | **Comments** |
| --- | --- | --- | --- | --- |
| 1**. Production Environment** | | | | |
| **1.1 Location and Surroundings** | | | | |
| a | Is the production site situated in an area prone to contamination (e.g., near waste disposal sites, or polluted water sources)? |  |  |  |
| b | Are there visible signs of environmental hazards (e.g., industrial waste, standing water, open sewage) around the production site? |  |  |  |
| **1.2 Cleanliness of the Production Area** | | | | |
| a | Is the production area free from dirt, debris, and potential contaminants? |  |  |  |
| b | Are there visible sources of contamination (e.g., mold, rust, accumulated grime) within the production area? |  |  |  |
| c | Is the waste from the production process properly managed and disposed of to prevent contamination? |  |  |  |
| **1.3 Water Quality and Usage** | | | | |
| a | Is the water used in production sourced from a safe, clean supply? |  |  |  |
| b | Are there visible signs of poor water quality (e.g., discoloration, odours) that could indicate contamination risks? |  |  |  |
| c | Is water stored in clean, covered containers to prevent contamination? |  |  |  |
| **1.4 Equipment and Tool Hygiene** | | | | |
| a | Are the tools and equipment used in production clean and maintained regularly to prevent rust, corrosion, or build-up of harmful substances? |  |  |  |
| b | Are tools stored in sanitary conditions when not in use, preventing exposure to contaminants? |  |  |  |
| **2. Worker Hygiene Practices** | | | | |
| **2.1 Personal Hygiene** | | | | |
| a | Do workers demonstrate good personal hygiene (e.g., clean hands, clean clothing) during production? |  |  |  |
| b | Are workers wearing appropriate protective gear (e.g., gloves, aprons) to minimize contamination risks? |  |  |  |
| c | Are there signs of workers engaging in unsanitary practices (e.g., eating, smoking) while handling alcohol or equipment? |  |  |  |
| **2.2 Health Conditions** | | | | |
| a | Are workers free from visible signs of illness or infection that could pose a health risk during production? |  |  |  |
| b | Are there measures in place to prevent sick workers from participating in production? |  |  |  |
| **3. Sanitation and Pest Control** | | | | |
| **3.1 Sanitation Practices** | | | | |
| a | Are regular cleaning schedules evident for the production area, equipment, and tools? |  |  |  |
| b | Is there a presence of cleaning supplies and sanitizers, and are they being used effectively to maintain hygiene? |  |  |  |
| c | Are waste products from the production process promptly and safely disposed of to prevent contamination? |  |  |  |
| **3.2 Pest Control** | | | | |
| a | Are there visible signs of pests (e.g., rodents, insects) in or around the production and storage areas? |  |  |  |
| b | Are there pest control measures (e.g., traps, barriers) in place to minimize contamination risks? |  |  |  |
| **4. Storage Conditions** | | | | |
| **4.1 Storage of Raw Materials** | | | | |
| a | Are raw materials stored in clean, dry, and secure conditions to prevent contamination? |  |  |  |
| b | Is there evidence of pest infestation or exposure to contaminants in the storage area? |  |  |  |
| **4.2 Storage of Finished Products** | | | | |
| a | Are finished products stored in a way that protects them from contamination (e.g., off the ground, in sealed containers)? |  |  |  |
| b | Are there signs of contamination (e.g., foreign objects, spoilage) in stored products? |  |  |  |

**QUALITATIVE TOOLS**

**IDI- RETAILORS**

**In-depth interview with Illicit Retailers/Distributors**

**Introductions:** Thank you for meeting with me today. I’m from Makerere University. We would like to get your views regarding alcohol consumption in Uganda. Before we begin the interview, let me read a consent form that explains the purpose, objectives, benefits, and risks of participating in this study. I will then allow you to ask questions or seek clarification regarding the study. After that, I will then ask whether you agree to participate in the interview or not.

**Practice Descriptive Information: *Please read verbatim*** *“*Globally, illicit alcohol poses a significant public health and economic threat due to the associated factors. Illicit alcohol refers to alcoholic beverages, whether fermented or distilled, that exist outside the legal regulatory framework of a given country. These drinks include Crude waragi, kwetee, muramba, Magwa etc. These beverages are produced, distributed, or sold without adhering to the established laws and regulations governing alcohol production, distribution, and sale. Illicit alcohol can encompass various forms, including counterfeit and illicit brands, smuggled alcohol, illicit homebrew, surrogate alcohol, and cases where proper taxation procedures have not been followed*”*

*READ CONSENT FORM and obtain consent from the respondent before you commence with the interview.*

| **No** | **Question** | **Probes** |
| --- | --- | --- |
| **Demographic Information** | | |
| **1** | - - What is your gender?   - How old are you?   - What is your highest level of education? | - - ________________   - ________________   - ________________ |
| **2** | Where is your business located? | - - *Is it in a city, peri-urban, urban, or rural area?*   - *How close is your business to other places like markets, schools, or government offices*? |
| **3** | How long have you been in the alcohol retail or distribution business? | - - *Did you start with selling alcohol or another business?* |
| **Retailer Business Characteristics** | | |
| **4** | What types of alcohol do you sell? | - - *Do you sell licit, illicit, or both types of alcohol?*   - *Which is more popular among your customers?* |
| **5** | How many employees do you have? | - - *Do they help with selling, stocking, or other business operations?* |
| **6** | Have you registered or acquired a license to operate your business? | - - *If not, what are your reasons for not registering or acquiring a license?*   - *Does the lack of a license affect your business?* |
| **7** | What type of retail business do you run? | - - *Is it a local bar, bottle store, supermarket, or another type of establishment?* |
| **Alcohol Stock and Sales** | | |
| **8** | What is the most commonly sold type of alcohol at your business? | - - *Do you sell opaque beer, clear beer, spirits, or wines?*   - *Do you sell multiple types of alcohol, or just focus on one? Why?* |
| **9** | What is the age group of your main customers? | - - *Do you sell mostly to youth, middle-aged adults, or older adults?*   - *Are there any minors who attempt to purchase alcohol?* |
| **10** | How frequently do you restock your alcohol inventory? | - - *Do you stock daily, weekly, or monthly?*   - *Do you face any challenges with getting supplies?* |
| **11** | Who supplies your alcohol? | - - *Do you get your alcohol from formal distributors, wholesalers, or local brewers?*   - *Do you face any challenges with suppliers?* |
| **Health and Safety Concerns** | | |
| **12** | Have you received any complaints from customers about the alcohol you sell? | - - *What type of complaints have you received (e.g., health issues, quality concerns)?*   - *How do you address these complaints?* |
| **13** | What steps do you take to ensure the alcohol you sell is safe for consumption? | - - *How do you handle and store your alcohol?*   - *Do you provide any warnings or information about the alcohol to your customers?* |
| **14** | Have you ever witnessed any health issues among customers that could be related to the alcohol you sell? | - - *Can you describe any incidents?*   - *How do you respond to these situations?* |
| **Business Challenges and Future Outlook** | | |
| **15** | What challenges do you face in running your alcohol retail business | - - *Are there challenges with obtaining stock, regulations, or competition?*   - *How do these challenges affect your business?* |
| **16** | What do you think could improve your business operations? | - - *Do you think government support, changes in regulations, or better supply chains would help?*   - *How would you like to see the alcohol retail industry change in the future?* |

**IDI-PRODUCERS**

**Introduction**

***INSTRUCTIONS***: Use this guide with relevant stakeholders from **Production** industry

**Introductions:** Thank you for meeting with me today. I’m from Makerere university Kampala-Uganda. We would like to get your views regarding alcohol consumption in Uganda. Before we begin the interview, let me read a consent form that explains the purpose, objectives, benefits, and risks of participating in this study. I will then allow you to ask questions or seek clarification regarding the study. After that, I will then ask whether you agree to participate in the interview or not.

**Practice Descriptive Information**: *Please read verbatim:*"Globally, illicit alcohol poses a significant public health and economic threat due to the associated factors. Illicit alcohol refers to alcoholic beverages, whether fermented or distilled, that exist outside the legal regulatory framework of a given country. These drinks include Crude waragi, kwetee, muramba, Magwa etc, etc. These beverages are produced, distributed, or sold without adhering to the established laws and regulations governing alcohol production, distribution, and sale. Illicit alcohol can encompass various forms, including counterfeit and illicit brands, smuggled alcohol, illicit homebrew, surrogate alcohol, and cases where proper taxation procedures have not been followed.

***READ CONSENT FORM and obtain consent from the respondent before you commence with the interview***

| **No** | **Question** | **Probs** |
| --- | --- | --- |
| **Background Information** | | |
| **1** | Can you tell me about your involvement in alcohol production? | - - *How long have you been involved in this business?*   - *What motivated you to start producing alcohol*? |
| **2** | What types of alcohol do you produce? | - - *Do you produce only illicit alcohol or a combination of illicit and licit types?*   - *What are the most popular products among your customers?* |
| **3** | Have you registered your business? | - - *If yes, why?*   - *If no, why not?* |
| **4** | What is the size of your production facility? | - - *How many people do you employ/ work for you?*   - *On average, how many liters of alcohol do you produce per day?* |
| **Production Process** | | |
| **5** | Could you describe the process you use to produce alcohol? | - - *What ingredients do you use?*   - *How do you ensure the quality and consistency of your product?* |
| **6** | What types of containers do you use in production? | - - *Are there reasons for choosing specific types of containers?*   - *How do you maintain hygiene during the production process?* |
| **7** | How do you determine the alcohol content (ABV) of your products? | - - *Do you test the ABV regularly?*   - *Have there been instances where the ABV varies significantly?* |
| **8** | What challenges do you face in the production process? | - - *Are there any regulatory or environmental challenges?*   - *How do you address these challenges?* |
| **Market and Distribution** | | |
| **10** | Who are your main customers? | - - *Do you sell more to individuals (B2C) or businesses (B2B)?*   - *What age group is the most frequent buyer of your products?* |
| **11** | How do you package your alcohol for sale? | - - *Are there specific reasons for your choice of packaging?*   - *How does packaging affect your sales?* |
| **12** | What is your busiest time of the year for sales? | - - *Are there specific reasons for this peak period?*   - *How do you prepare for this peak period?* |
| **Health and Safety** | | |
| **13** | Have there been any incidents where your alcohol caused health issues for consumers? | - - *Can you describe what happened?*   - *What steps did you take to prevent such incidents in the future?* |
| **14** | How do you ensure the safety and cleanliness of your production environment? | - - *What measures do you take to prevent contamination?*   - *How do you manage waste and sanitation in your production area?* |
| **15** | Are you aware of any health risks associated with the alcohol you produce? | - - *How do you inform your customers about these risks?*   - *Have you received any feedback from customers regarding health concerns?* |
| **Regulatory Environment** | | |
| **16** | What is your view on the current regulations governing alcohol production? | - - *Do you find it difficult to comply with these regulations?*   - *How do these regulations impact your business?* |
| **17** | Have you ever faced legal challenges or enforcement actions related to your production? | - - *Can you describe your experience?*   - *How did you resolve these issues?* |
| **Future Outlook** | | |
| **18** | What are your plans for the future of your alcohol production business? | - - *Are you considering expanding or diversifying your products?*   - *What changes would you like to see in the industry or regulations?* |

**KII – Government Officers (Local Government Staff - Community Development Officer, (CDO); District Health Officer, (DHO); District Production Officer (DPO); Ministry of Health, (MoH))**

**Introductions:**

Thank you for meeting with me today. I’m from Makerere University. We would like to get your views regarding alcohol consumption in Uganda. Before we begin the interview, let me read a consent form that explains the purpose, objectives, benefits, and risks of participating in this study. I will then allow you to ask questions or seek clarification regarding the study. After that, I will then ask whether you agree to participate in the interview or not.

**Practice Descriptive Information: *Please read verbatim*** *“*Globally, illicit alcohol poses a significant public health and economic threat due to the associated factors. Illicit alcohol refers to alcoholic beverages, whether fermented or distilled, that exist outside the legal regulatory framework of a given country. These drinks include Crude waragi, kwetee, muramba, Magwa etc. These beverages are produced, distributed, or sold without adhering to the established laws and regulations governing alcohol production, distribution, and sale. Illicit alcohol can encompass various forms, including counterfeit and illicit brands, smuggled alcohol, illicit homebrew, surrogate alcohol, and cases where proper taxation procedures have not been followed*”*

***READ CONSENT FORM and obtain consent from the respondent before you commence with the interview.***

**Community Development Officer (CDO)**

| **No** | **Question** | **Probes** |
| --- | --- | --- |
|  | **Background Information** | |
|  | 1. Gender 2. Age 3. Position 4. Years of Service 5. Organisation/ | ­­­­­­­­­­­­­­ |
|  | **Review of Illicit Alcohol Types and Health Harms** | |
| **1** | What are your observations about the types of illicit alcohol consumed in your community (e.g., opaque beer, clear beer, spirits)? | - - *Can you describe the differences in consumption patterns between these types of alcohol?*   - *Are certain types more common among specific groups (e.g., youth, elderly, men, women)?* |
| **2** | How do these different types of alcohol affect community members' health? | - - *Are there any noticeable health consequences, such as poisoning, chronic illness, or addiction?*   - *How do these health effects vary between licit and illicit alcohol?* |
| **3** | Have there been any community-based interventions related to illicit alcohol consumption? | - - *Can you share details on the success or challenges of these interventions?*   - *How have local leaders or NGOs been involved*? |
|  | **Populations at Risk and Consumption Patterns** | |
| **4** | Which population groups in your community are most at risk of consuming illicit alcohol? | - - *Why do you think these groups are more vulnerable?*   - *Are there particular socio-economic or cultural factors contributing to this vulnerability?* |
| **5** | Can you quantify or estimate the extent of illicit alcohol consumption within these groups? | - - *Do you have any data or informal assessments on consumption levels?*   - *Are there visible trends, such as increased or decreased consumption over time?* |
| **6** | How does urbanization affect the risk of illicit alcohol consumption? | - - *Are there differences between urban and rural areas in terms of access to illicit alcohol?*   - *How does migration to urban centres impact consumption patterns?* |
|  | **Drivers of Use and Abuse of Illicit Alcohol** | |
| **7** | What factors drive individuals, especially in key populations, to use illicit alcohol? | - - *Is cost a major factor in choosing illicit alcohol over legal alternatives?*   - *What role does peer pressure or social environment play?* |
| **8** | Why are illicit spirits more prevalent among certain groups? | - - *Are there cultural or traditional factors influencing this?*   - *How does availability (e.g., illegal markets) affect this trend?* |
| **9** | What role does the socio-economic situation play in promoting illicit alcohol consumption? | - - *How does poverty, unemployment, or lack of education contribute?*   - *Are there specific triggers, such as economic downturns or social unrest?* |
|  | **Health Risks from Production and Retail** | |
| **10** | What are the common hygiene and sanitation issues observed in the production and retail of illicit alcohol in your community? | - - *Have you visited any production sites, and what were the conditions like?*   - *How does poor sanitation contribute to health risks for consumers?* |
| **11** | How do these conditions contribute to health risks for consumers? | - *Are there any specific diseases or health conditions that you can link to poor production practices?* |
|  | **Pathways to Harmful Consumption and Barriers to Cessation** | |
| **12** | What are the common motivators and triggers leading to harmful consumption of illicit alcohol in your community? | - - *How do family dynamics or personal issues (e.g., stress, trauma) play a role?*   - *Is there a connection between economic hardship and increased consumption?* |
| **13** | What are the key barriers preventing people from stopping the harmful use of illicit alcohol? | - - *Are there any rehabilitation programs, and how effective are they?*   - *Are stigma or fear of legal repercussions barriers to seeking help?* |
| **14** | What interventions or support mechanisms could help reduce illicit alcohol consumption? | - - *Are there examples from other communities that could be replicated here?*   - *What role can government or community leaders play in creating* solutions? |

**District Health Officer (DHO)**

| **No** | **Question** | **Probes** |
| --- | --- | --- |
| **A.** | **Background Information** | |
|  | 1. Gender 2. Age 3. Position 4. Years of Service 5. Organisation | ­­­­­­­­­­­­­­ |
| *B.* | **Review of Illicit Alcohol Types and Health Harms** | |
| **1** | Based on your experience, what are the most common types of illicit alcohol consumed in your district? | - - *Do you have any records of health cases linked to specific types of alcohol?*   - *How does consumption of these alcohol types compare with legal alternatives?* |
| **2** | Can you share any data on the health consequences linked to illicit alcohol consumption (e.g., alcohol poisoning, long-term health effects)? | - - *Are there any specific diseases or conditions that have become more prevalent?*   - *How are hospitals or health facilities responding to these cases?* |
| **3** | Are there ongoing biochemical studies on these products, and what results have emerged? | - - *What are the alcohol-by-volume (ABV) levels in these products?*   - *Are there particular contaminants or toxins identified in illicit alcohol?* |
| **C.** | **Populations at Risk and Consumption Patterns** | |
| **4** | Which populations are you most concerned about in terms of illicit alcohol consumption, and why? | - - *Do you have any specific age groups or demographics in mind?*   - *How does the risk differ between urban and rural populations?* |
| **5** | Are there any public health initiatives targeting these at-risk groups? | - - *Can you describe how effective these initiatives have been?*   - *What gaps exist in these programs?* |
| **6** | What data do you have on the prevalence of illicit alcohol consumption in urban populations? | - - *Are there any community surveys or health assessments related to this?*   - *How has consumption changed over recent years?* |
|  | **Drivers of Use and Abuse of Illicit Alcohol** | |
| **7** | From a public health perspective, what are the key drivers of illicit alcohol consumption? | - - *Is it primarily economic, social, or cultural factors?*   - *Are certain drivers more prominent in urban areas?* |
| **8** | What role do stress, unemployment, and other social factors play in increasing illicit alcohol abuse? | - - *How do social support systems or the lack thereof affect consumption rates?*   - *Are there any mental health components related to illicit alcohol consumption?* |
| **9** | Are there any specific triggers leading to higher consumption among key populations (e.g., youth, low-income groups)? | - - *How do social events or local traditions contribute to consumption?*   - *What role do price and accessibility play?* |
|  | **Health Risks from Production and Retail** | |
| **10** | Can you highlight the major health risks associated with the production and sale of illicit alcohol in unsanitary conditions? | - - *Have there been any cases of contamination (e.g., methanol poisoning)?*   - *What risks come from poor storage practices or improper distillation methods?* |
| **11** | How often do you encounter health complications arising from consumption of poorly produced or stored illicit spirits? | - Are there any patterns in the types of health issues (e.g., gastrointestinal, neurological)? |
|  | **Pathways to Harmful Consumption and Barriers to Cessation** | |
| **12** | What are the main triggers for harmful consumption patterns in your district? | - - *Are economic crises or social instability contributing factors?*   - *Do cultural norms or traditions promote heavy consumption*? |
| **13** | What challenges does the health system face in addressing harmful consumption and promoting cessation of illicit alcohol use? | - - *Are there enough rehabilitation programs or support systems in place?*   - *How effective are the current public health campaigns?* |
| **14** | What role can community health programs play in reducing illicit alcohol consumption? | - - *Can mobile clinics or outreach programs be effective in this regard?*   - *Are there any successful community health initiatives that could be scaled up?* |

**District Production Officer (DPO)**

| **No** | **Question** | **Probes** |
| --- | --- | --- |
| **A.** | **Background Information** | |
|  | 1. Gender 2. Age 3. Position 4. Years of Service 5. Organisation/ | ­­­­­­­­­­­­­­ |
| *B.* | **Review of Illicit Alcohol Types and Health Harms** | |
| **B1** | What types of illicit alcohol are being produced or imported into the district? | - - *Are these types locally produced or imported from other regions?*   - *How widespread is the production of illicit spirits compared to other forms of alcohol?* |
| **B2** | How do you think the quality of illicit alcohol compares with licit alcohol in terms of health risks? | - - *What contaminants or poor production processes are you aware of?*   - *Are there reports of illnesses or deaths resulting from low-quality alcohol?* |
| **B3** | Have any production studies been conducted to assess the safety and ABV percentages of illicit alcohol? | - - *What were the findings regarding alcohol content and toxins?*   - *Have there been any regulatory efforts to curb the production of illicit alcohol?* |
| **C.** | **Populations at Risk and Consumption Patterns** | |
| **C1** | Which population groups in your district are most vulnerable to consuming illicit alcohol, and why? | - *Are certain demographics (e.g., youth, low-income groups, unemployed individuals) more likely to consume illicit alcohol?* - *What role does gender or age play in determining vulnerability?* - *How does community outreach or local government intervention impact these groups?* |
| **C2** | What role does access to licit alcohol play in driving these groups toward illicit alternatives? | - *Are there any economic barriers to accessing licit alcohol in the district?* - *How does the pricing of licit alcohol compare to illicit alcohol?* - *Are there specific policies or enforcement measures that limit access to licit alcohol, leading to increased illicit consumption?* |
| **C3** | Do you have any data or estimates on the scale of illicit alcohol consumption among urban populations? | - *Is the consumption of illicit alcohol more prevalent in urban or rural areas of the district?* - *What data sources are used to estimate these consumption patterns (e.g., surveys, health reports)?* - *Are there visible trends of increasing or decreasing consumption in certain areas?* |
|  | **Drivers of Use and Abuse of Illicit Alcohol** | |
| **D1** | What are the key economic or supply chain factors driving the production and consumption of illicit alcohol? | - *Are there specific economic challenges (e.g., unemployment, inflation) that make illicit alcohol more appealing?* - *How do production costs or market demand affect the availability of illicit alcohol?* - *Is there a relationship between the informal economy and illicit alcohol production?* |
| **D2** | Are there any specific production factors (e.g., cost, accessibility) that make illicit spirits more appealing? | - *What role do local suppliers or distributors play in the production and accessibility of illicit spirits?* - *How does the ease of production (e.g., lack of regulation, cheap ingredients) contribute to the popularity of illicit spirits?* - *How accessible is the raw material (e.g., sugar, yeast) for producing illicit alcohol in your district?* |
|  | **Health Risks from Production and Retail** | |
| **E1** | What production practices have you observed that pose a risk to consumer health? | - *Are there specific production sites or methods that are known for being unsanitary or unsafe?* - *How are chemicals or additives handled during production, and how do they impact health risks?* - *Have there been any incidents of mass poisoning or health crises linked to illicit alcohol in your district?* |
| **E2** | How is hygiene regulated (or not) in the production and distribution of illicit alcohol? | - *Are there any government inspections or local monitoring of illicit production sites?* - *What are the most common hygiene violations in the production or sale of illicit alcohol?* - *How do these unsanitary conditions affect the end product?* |
|  | **Pathways to Harmful Consumption and Barriers to Cessation** | |
| **F1** | What do you see as the common motivators and triggers for harmful consumption in your district? | - *Are there cultural or traditional factors influencing consumption behaviours?* - *How do economic hardships, such as unemployment or poverty, contribute to harmful consumption?* - *Are there psychological factors (e.g., stress, trauma) that act as motivators?* |
| **F2** | What economic or production-related barriers exist for reducing the production and availability of illicit alcohol? | - *Are there specific local policies or regulations that hinder the reduction of illicit alcohol production?* - *What role do informal markets or unregulated suppliers play in sustaining production?* - *How does the lack of resources or enforcement capacity affect efforts to curb production?* |
| **F3** | What policies or strategies could help curb harmful alcohol production and consumption? | - *Are there successful examples from other regions that could be implemented in your district?* - *What role do local government and community leaders play in shaping policies?* - *Are there economic incentives that could shift production towards legal alternatives?* |

### **Ministry of Health (MoH) Official**

| **No** | **Question** | **Probes** |
| --- | --- | --- |
| **A.** | **Background Information** | |
|  | 1. Gender 2. Age 3. Position 4. Years of Service 5. Organisation/ | ­­­­­­­­­­­­­­ |
| *B.* | **Review of Illicit Alcohol Types and Health Harms** | |
| **B1** | From a national perspective, how does illicit alcohol consumption compare to licit alcohol in terms of health risks? | - *Are there any national data or reports on hospital admissions linked to illicit alcohol consumption?* - *How does the severity of health complications from illicit alcohol compare to those from licit alcohol?* - *Are certain illicit alcohol types (e.g., spirits, home brews) associated with higher risks?* |
| **B2** | What biochemical studies have been conducted on illicit alcohol, and what findings stand out? | - *Have studies identified common contaminants or toxins in illicit alcohol products?* - *What are the average ABV percentages of illicit spirits compared to licit alcohol?* - *How have these findings influenced public health interventions?* |
| **B3** | How does the Ministry address health complications resulting from illicit alcohol? | - *What public health campaigns or programs have been launched to address this issue?* - *Are there any specialized health services or units for treating alcohol-related harm?* - *How does the Ministry collaborate with local health authorities to manage this issue?* |
| **C.** | **Populations at Risk and Consumption Patterns** | |
| **C1** | How does the Ministry identify and stratify populations most at risk of illicit alcohol consumption? | - *Are there specific demographic indicators (e.g., age, income, employment status) used to assess risk?* - *What role does regional or district-level data play in identifying at-risk populations?* - *How does gender factor into stratifying these populations?* |
| **C2** | What is the scale of illicit alcohol consumption in urban versus rural populations, based on your data? | - *Are there noticeable differences in consumption patterns between urban and rural areas?* - *How does migration to urban centers affect consumption rates?* - *What are the Ministry’s strategies for addressing illicit alcohol consumption in densely populated areas?* |
|  | **Drivers of Use and Abuse of Illicit Alcohol** | |
| **D1** | In your view, what are the main drivers of illicit alcohol consumption at a national level? | - *Are economic factors (e.g., affordability, unemployment) the primary drivers?* - *What role does social or cultural pressure play in promoting illicit alcohol consumption?* - *How do legal restrictions or taxation on licit alcohol drive individuals towards illicit options?* |
| **D2** | What specific efforts is the Ministry undertaking to address these drivers among key populations? | - *Are there targeted programs for youth, low-income groups, or rural populations?* - *How are prevention campaigns tailored to address the socio-economic drivers of illicit alcohol use?* - *Are there collaborations with other ministries or stakeholders to address these drivers?* |
|  | **Health Risks from Production and Retail** | |
| **E1** | How does the Ministry address the health risks stemming from the production and sale of illicit alcohol in unsanitary conditions? | - *Are there regulations or enforcement measures that focus on hygiene in alcohol production?* - *How does the Ministry coordinate with local authorities to monitor production practices?* - *Have there been any national incidents of contamination linked to unsanitary production?* |
| **E2** | What data does the Ministry have on health outcomes linked to illicit alcohol consumption? | - *Are there health surveillance systems tracking alcohol-related illnesses or deaths?* - *What are the most common health complications arising from illicit alcohol consumption?* - *How frequently do these cases lead to hospitalizations or fatalities?* |
|  | **Pathways to Harmful Consumption and Barriers to Cessation** | |
| **F1** | What national programs are in place to reduce harmful alcohol consumption? | - *Are there existing harm reduction strategies specifically targeting illicit alcohol consumption?* - *What are the Ministry’s efforts to promote safe drinking practices?* - *How are treatment and rehabilitation services addressing the issue of alcohol addiction?* |
| **F2** | What do you see as the biggest challenges in helping individuals stop consuming illicit alcohol? | - *Are there socio-economic factors, such as poverty or lack of access to treatment, that prevent cessation?* - *How does the stigma around alcohol addiction affect people’s willingness to seek help?* - *What role does relapse prevention play in the Ministry’s programs?* |
| **F3** | What policies could help reduce the harmful consumption of illicit alcohol? | - *Are there recommendations for stricter regulations or taxation on illicit alcohol?* - *How could public education campaigns be enhanced to raise awareness?* - *Are there collaborations with other ministries (e.g., law enforcement) that could improve policy implementation?* |

**KII – Government Agencies**

**Introductions:**

Thank you for meeting with me today. I’m from Makerere University. We would like to get your views regarding alcohol consumption in Uganda. Before we begin the interview, let me read a consent form that explains the purpose, objectives, benefits, and risks of participating in this study. I will then allow you to ask questions or seek clarification regarding the study. After that, I will then ask whether you agree to participate in the interview or not.

**Practice Descriptive Information: *Please read verbatim*** *“*Globally, illicit alcohol poses a significant public health and economic threat due to the associated factors. Illicit alcohol refers to alcoholic beverages, whether fermented or distilled, that exist outside the legal regulatory framework of a given country. These drinks include Crude waragi, kwetee, muramba, Magwa etc. These beverages are produced, distributed, or sold without adhering to the established laws and regulations governing alcohol production, distribution, and sale. Illicit alcohol can encompass various forms, including counterfeit and illicit brands, smuggled alcohol, illicit homebrew, surrogate alcohol, and cases where proper taxation procedures have not been followed*”*

***READ CONSENT FORM and obtain consent from the respondent before you commence with the interview.***

| **No** | **Question** | **Probes** |
| --- | --- | --- |
|  | **Background Information** | |
| **1** | 1. Gender 2. Age 3. Position 4. Years of Service 5. Organisation/ | ­­­­­­­­­­­­­­ |
|  | **Review of Illicit Alcohol Types and Health Harms** | |
| **2** | What types of illicit alcohol have you identified in Uganda (e.g., opaque beer, clear beer, spirits)? | - *How do these illicit alcohol products differ in terms of alcohol content (ABV%) from regulated, licit alcohol?* - *Are there any specific types of illicit alcohol that pose higher health risks than others?* - *Has UNBS conducted any biochemical analyses on illicit alcohol, and what findings were most concerning?* |
| **3** | What health harms are associated with these illicit alcohol types, and how do they compare to licit alcohol? | - *Are there any notable chemical contaminants or harmful substances found in illicit alcohol?* - *How does UNBS categorize health risks based on the type and quality of illicit alcohol?* |
|  | **Populations at Risk and Consumption Patterns** | |
| **4** | Based on UNBS’s data, which population groups are most at risk of consuming illicit alcohol in Uganda? | - *Do urban populations consume more illicit alcohol than rural populations?* - *Are there particular demographics (age, gender, or socio-economic status) that are more prone to consuming illicit alcohol?* |
| **5** | What is the estimated scale of illicit alcohol consumption in urban areas? | - *Does the availability or affordability of licit alcohol influence the level of consumption of illicit alcohol?* - *How does UNBS stratify populations that are most affected by the health harms of illicit alcohol?* |
|  | **Drivers of Use and Abuse of Illicit Alcohol** | |
| **6** | What factors drive the production, distribution, and consumption of illicit alcohol in Uganda? | - *Are economic factors such as price, poverty, or availability key drivers of illicit alcohol use?* - *How do supply chain challenges (e.g., smuggling, black markets) affect the proliferation of illicit alcohol?* |
| **7** | Why are illicit spirits particularly popular among certain key populations? | - *Are there specific socio-economic or cultural factors that contribute to the abuse of illicit spirits?* - *What role does accessibility play in making illicit alcohol more appealing than regulated alcohol?* |
|  | **Health Risks from Production and Retail** | |
| **8** | What health risks arise from the production and retail of illicit alcohol, particularly regarding hygiene and sanitation? | - *Are there common hygiene or production practices that pose significant risks to consumers?* - *How does UNBS monitor or regulate the sanitation of facilities where illicit alcohol is produced or sold?* |
|  | **Pathways to Harmful Consumption and Barriers to Cessation** | |
| **9** | What are the common pathways that lead individuals to the harmful consumption of illicit alcohol? | - *What motivators or triggers enable people to engage in excessive consumption of illicit alcohol?* - *Are there any observed socio-economic pressures (e.g., unemployment) that contribute to harmful consumption?* |
| **10** | What barriers prevent individuals from stopping the consumption of illicit alcohol? | - *Does the affordability and easy availability of illicit alcohol make cessation difficult?* - *How do social stigma, addiction, or lack of rehabilitation options act as barriers to cessation?* |
